# Supplementary material
Source: Copernicus journal article supplement (doi:10.5194/bg-23-2365-2026)
Supplement: Supplementary file 1 [file bg-23-2365-2026-supplement.pdf]

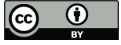

*Supplement of*

**Wood density variation in European forest species:  
drivers and implications for multiscale biomass  
and carbon assessment in France**

**Henri Cuny et al.**

*Correspondence to:* Henri Cuny ([henri.cuny@ign.fr](mailto:henri.cuny@ign.fr))

The copyright of individual parts of the supplement might differ from the article licence.

Supplementary Figures

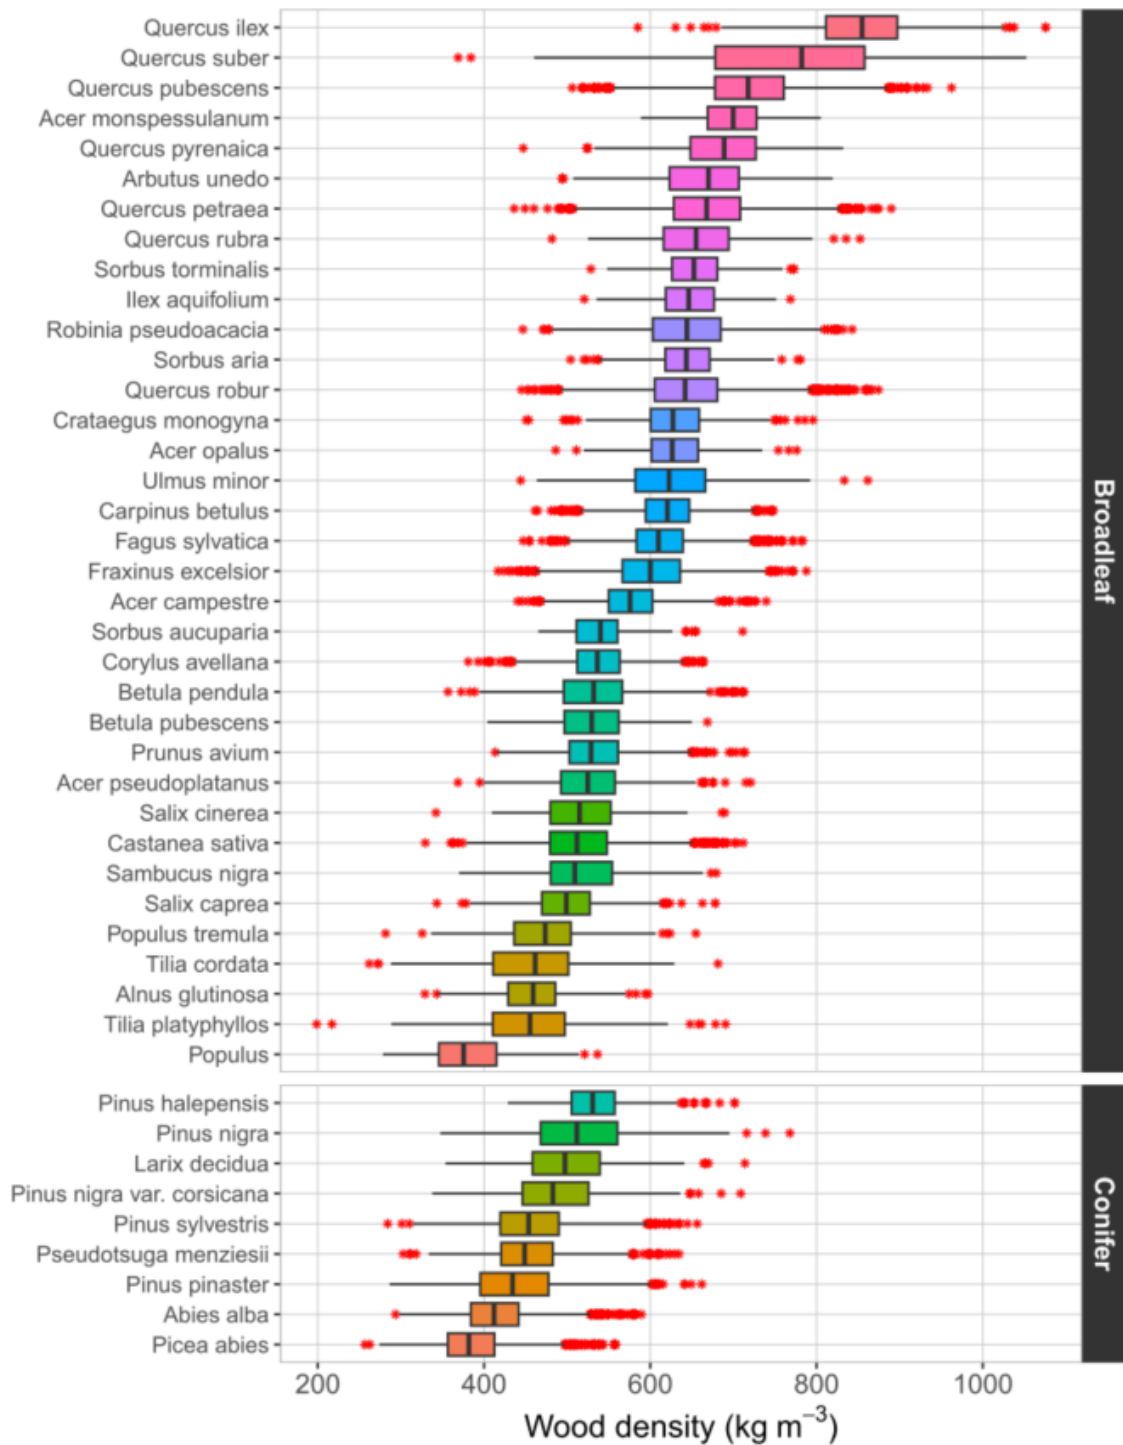

15

Figure S1: Boxplots of wood density by species. The 44 species present in the subset of XyloDensMap data selected for wood density modelling are represented. Species are sorted by decreasing order of average wood density, with a distinction between broadleaf and conifer species.

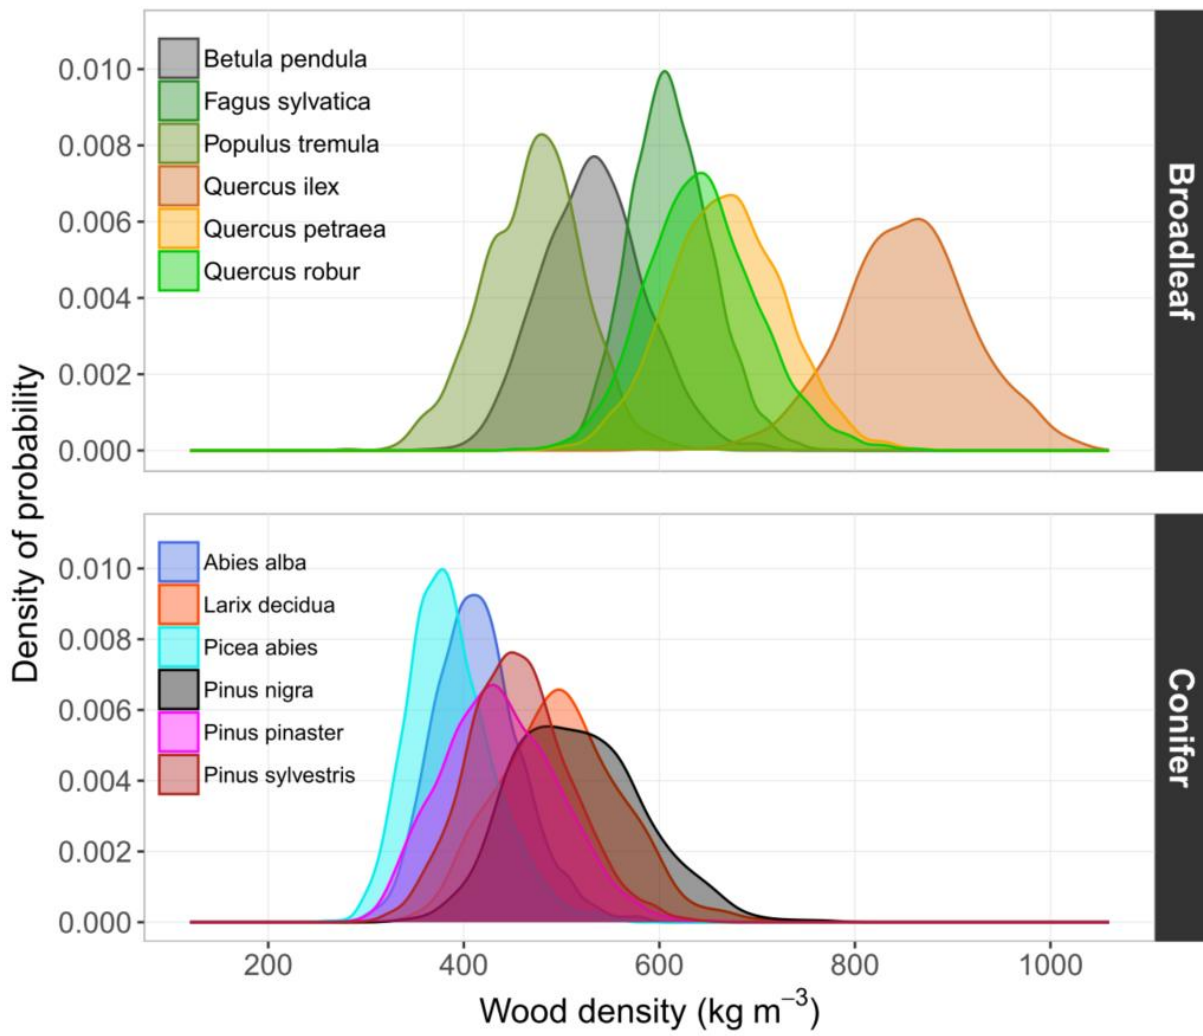

20 **Figure S2: Distribution of wood density values by species in the *XyloDensMap* data selected for wood density modelling. Results are shown for a subset of 6 conifer and 6 broadleaf species.**

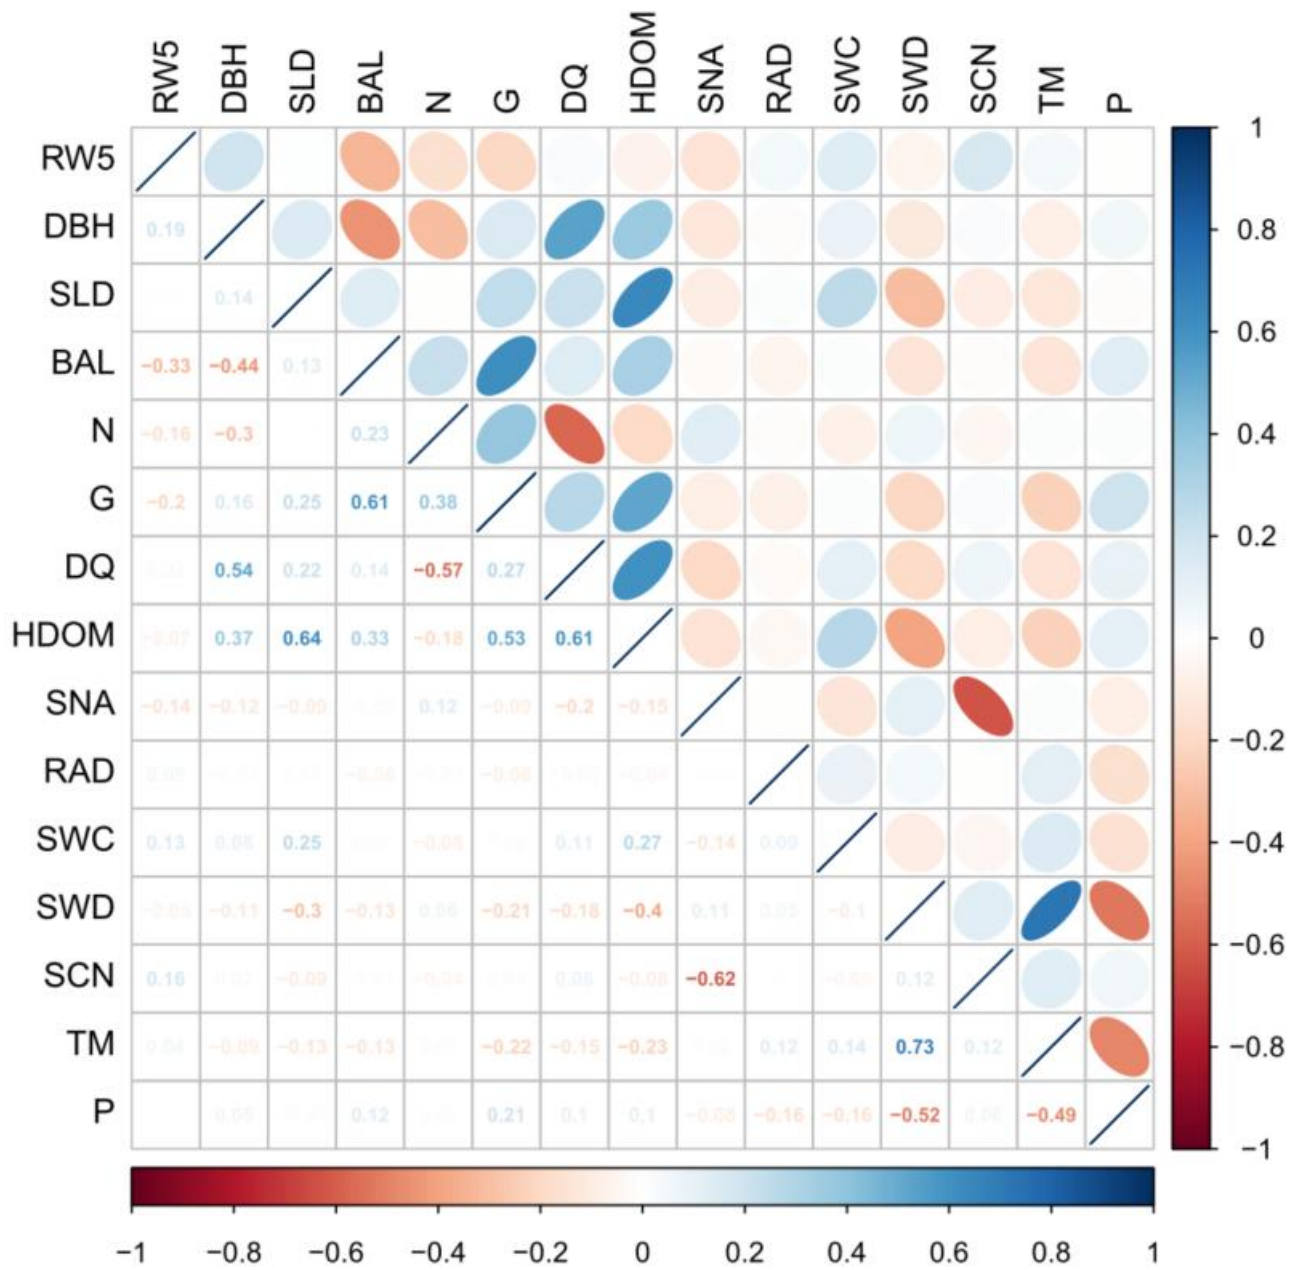

Figure S3: Correlation matrix between the 15 continuous or discrete variables considered for modelling wood density.

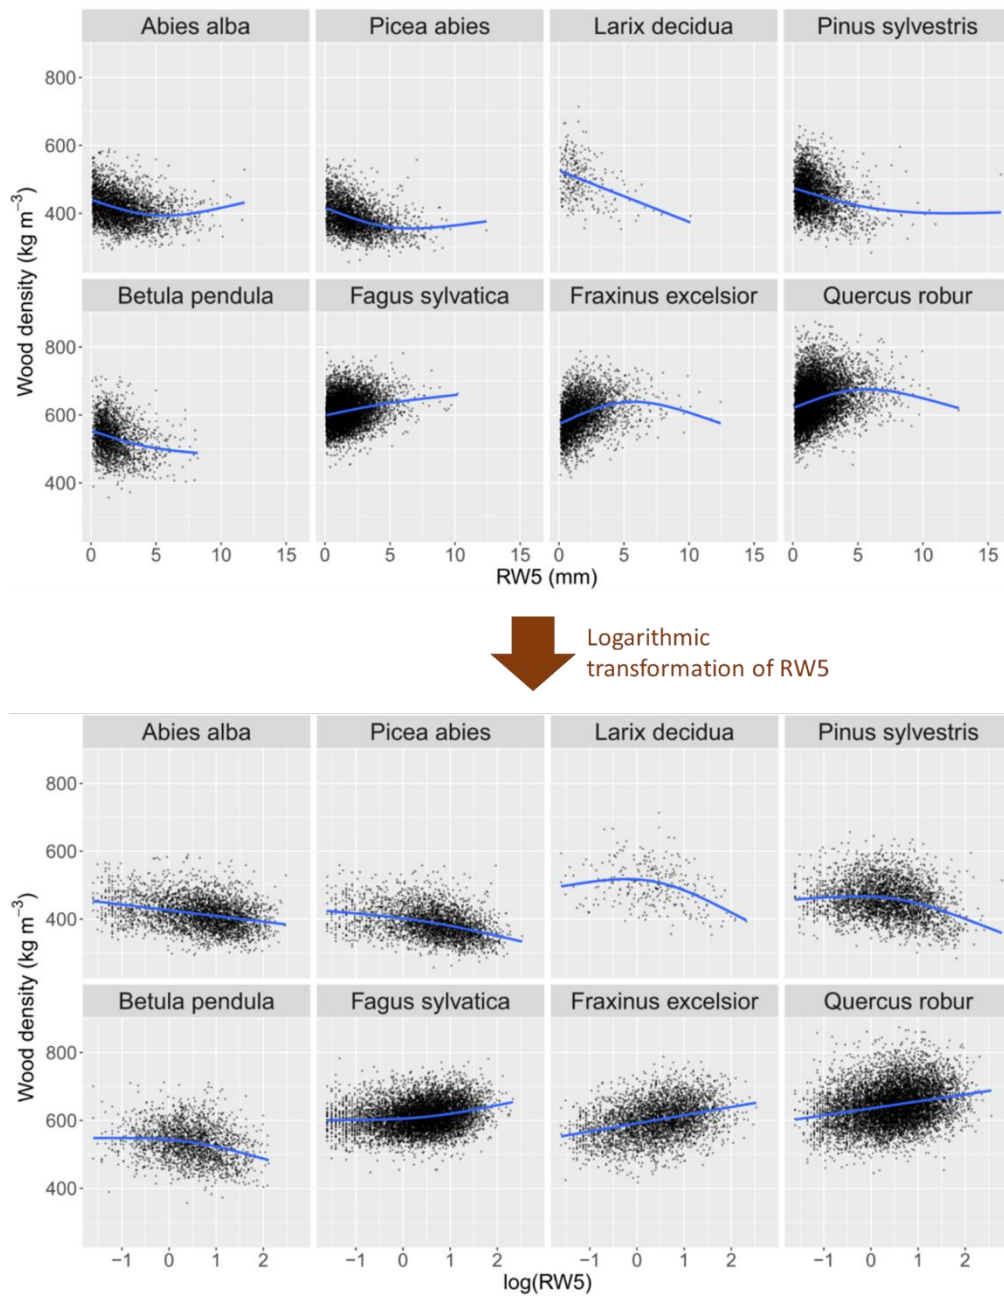

25

**Figure S4: Relationship between wood density and the average width of the last five rings (RW5) in the *XyloDensMap* data selected for modelling. The relationship is shown for a subset of 4 conifer and 4 broadleaf species. The logarithmic transformation of RW5 generally helps having a more centred distribution and a more linear relationship, which varied between species.**

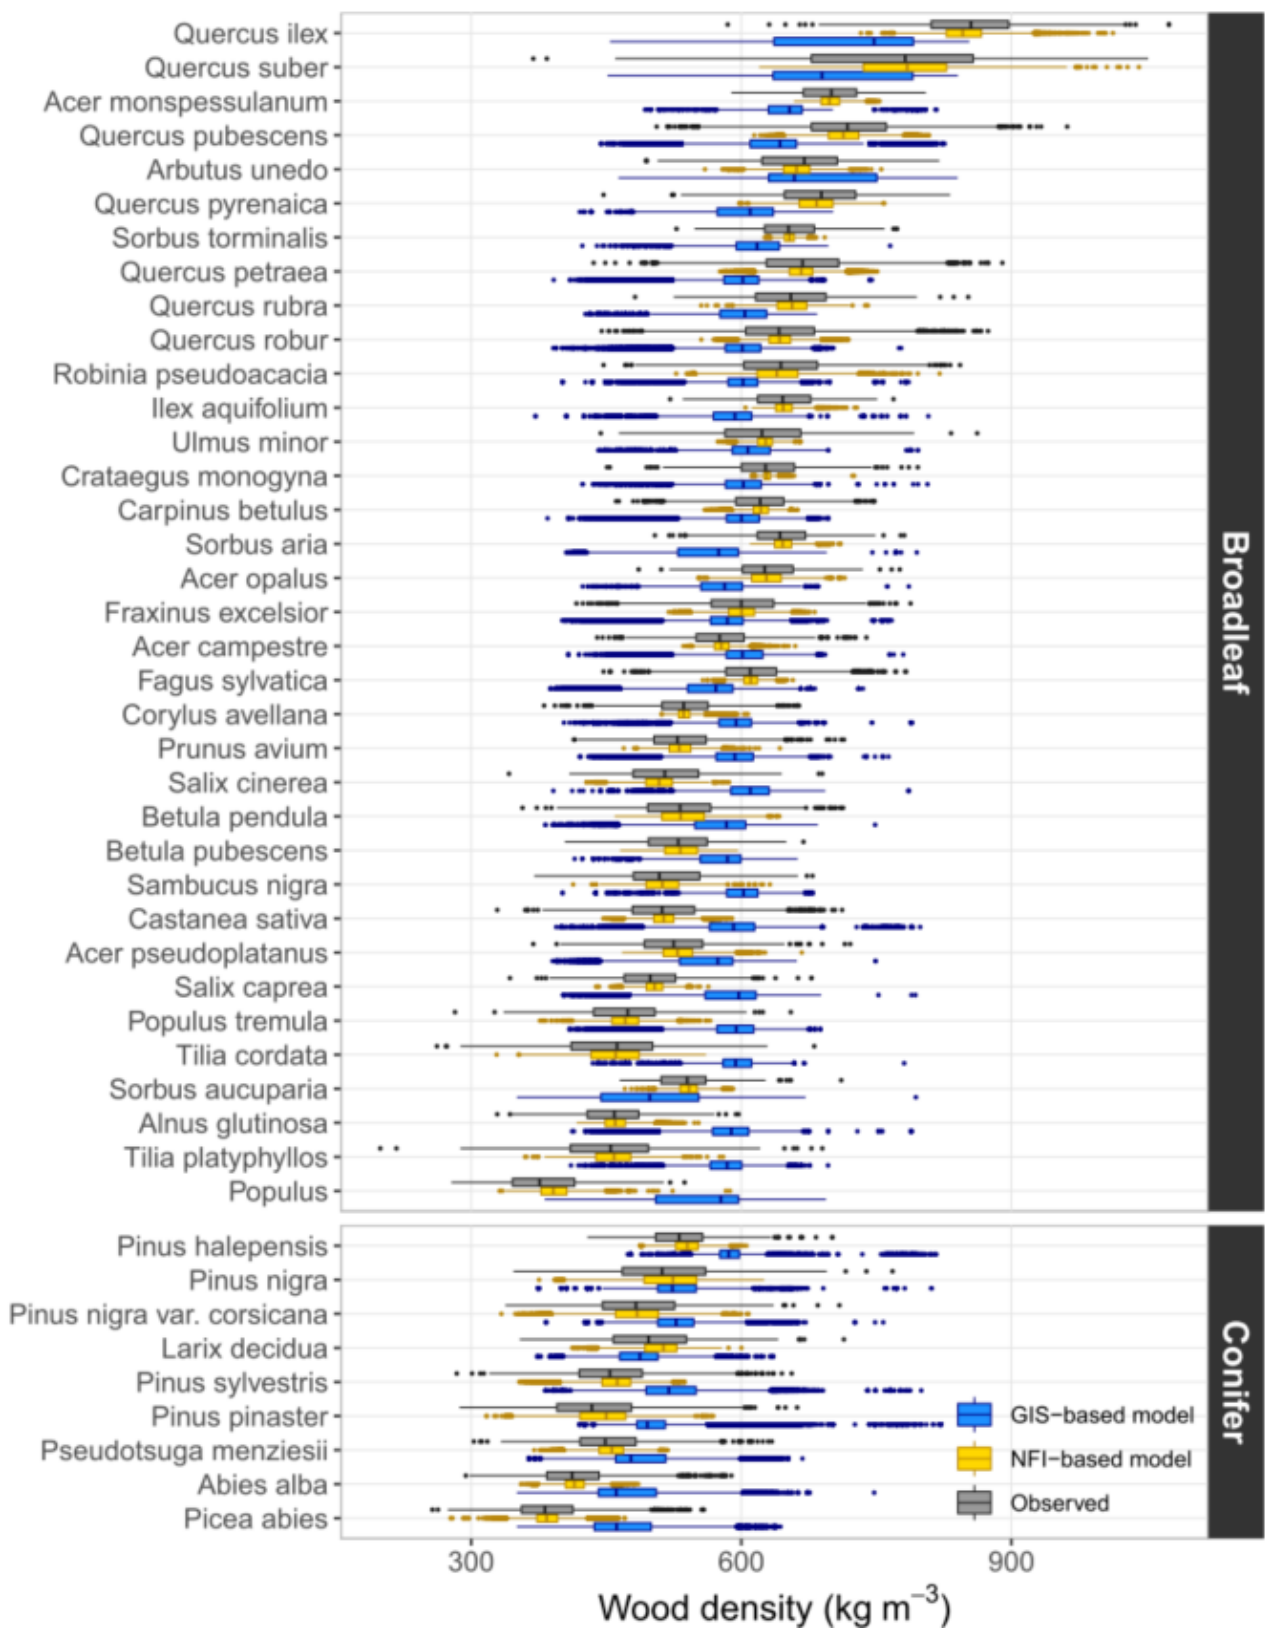

30 Figure S5: Wood density values predicted on the French NFI dataset and values observed in the *XyloDensMap* data selected for modelling. Observed values correspond to measurements on wood increment cores, while predicted values were obtained from the “NFI-based model” (yellow) and the “GIS-based model” (blue) developed on these measurements. Results are shown for the 44 species considered for modelling.

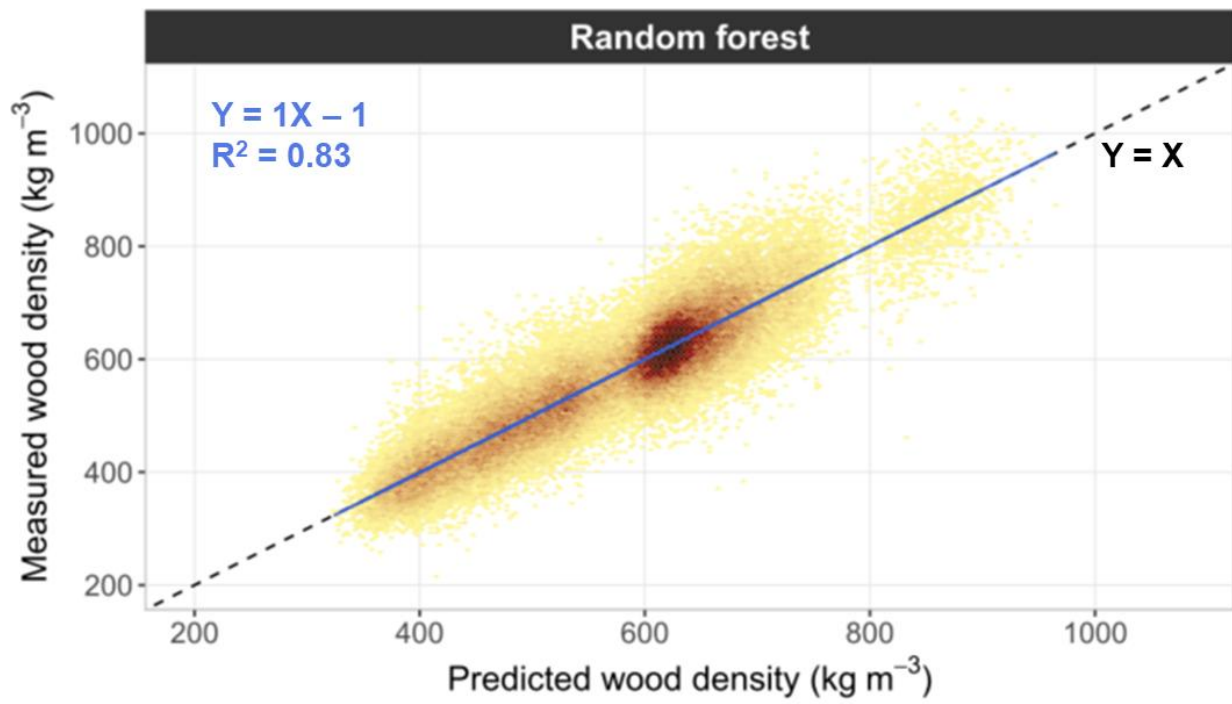

35 Figure S6: Measured versus predicted values of wood density on the full dataset, using random forest models instead of a linear model (same input variables as the “NFI-based model”). Colour depends on the number of points (the darker the colour, the higher the number of points). The solid blue line represents the OLS regression between predicted and measured values, and the dashed black line represents the 1:1 reference line.

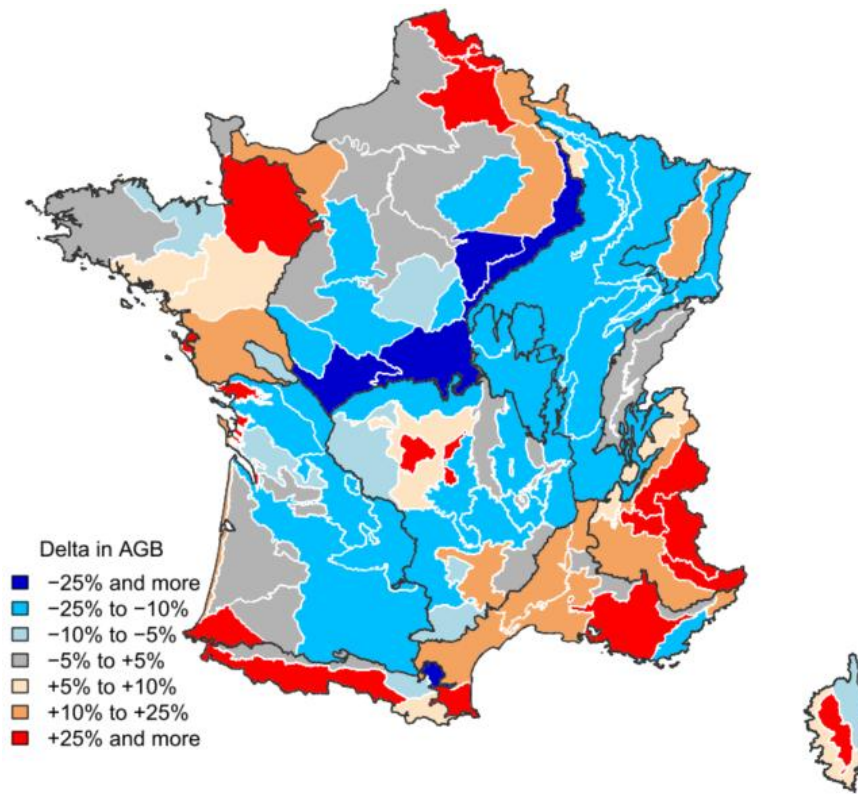

40 **Figure S7: Relative difference in forest aboveground biomass (AGB) stocks between estimates from our “NFI-based model” and a biomass map produced by the European Space Agency. All values represent relative differences with respect to the AGB estimated using the “NFI-based model”. Comparisons are shown across biogeographical subregions.**

## Supplementary Tables

45

**Table S1: Overview of the 20 candidate variables considered for wood density modelling, including details on the calculation method for each variable.**

| Variable        | Unit            | Type        | Signification                                  | Measurement/Calculation                                                                                                                                                                                                                                                                                                                                                                                                                                                                                                                               | Source |
|-----------------|-----------------|-------------|------------------------------------------------|-------------------------------------------------------------------------------------------------------------------------------------------------------------------------------------------------------------------------------------------------------------------------------------------------------------------------------------------------------------------------------------------------------------------------------------------------------------------------------------------------------------------------------------------------------|--------|
| Botanical class | -               | Categorical | Tree botanical class (broadleaf or conifer)    | Determined from the tree species identified in the field                                                                                                                                                                                                                                                                                                                                                                                                                                                                                              | NFI    |
| Genus           | -               | Categorical | Tree genus                                     | Determined from the tree species identified in the field                                                                                                                                                                                                                                                                                                                                                                                                                                                                                              | NFI    |
| Species         | -               | Categorical | Tree species                                   | Identified in the field by NFI operators for each tree recorded during the inventory                                                                                                                                                                                                                                                                                                                                                                                                                                                                  | NFI    |
| RW5             | mm              | Continuous  | Average width of the last five tree rings      | Measured in the field by NFI operators for each tree of the plot on increment cores taken at breast height (1.30 m) using a binocular magnifier, excluding the ring currently in formation.                                                                                                                                                                                                                                                                                                                                                           | NFI    |
| DBH             | cm              | Continuous  | Tree diameter at breast height                 | Calculated from the circumference at breast height (CBH, in cm) measured in the field using a tape:<br>$DBH_i = \frac{CBH_i}{\pi}$<br>where $DBH_i$ is the diameter at breast height of the $i^{th}$ tree and $CBH_i$ its circumference                                                                                                                                                                                                                                                                                                               | NFI    |
| SLD             | -               | Continuous  | Tree slenderness                               | Calculated as the ratio between the tree height and the square root of the diameter at breast height (Vallet et al., 2006): $SLD_i = \frac{H_i}{\sqrt{DBH_i}}$<br>where $SLD_i$ is the slenderness of the $i^{th}$ tree, $H_i$ its total height (in m) as measured in the field, and $DBH_i$ its diameter at breast height (in cm)                                                                                                                                                                                                                    | NFI    |
| BAL             | $m^2 ha^{-1}$   | Continuous  | Basal area of larger trees (competition index) | Calculated for each tree in the plot as the sum of the basal areas of all trees with a diameter at breast height greater than that of the subject tree (Wykoff, 1983):<br>$BAL_i = \sum_{j:DBH_j > DBH_i} BA_j \times w_j$<br>where $BAL_i$ denotes the basal area of larger trees for the $i^{th}$ tree, and $BA_j$ and $w_j$ are the basal areas ( $m^2$ ) and statistical weights (in trees $ha^{-1}$ ) of the $j^{th}$ trees in the sampling plot with a diameter at breast height (DBH) greater than that of the $i^{th}$ tree                   | NFI    |
| N               | trees $ha^{-1}$ | Continuous  | Number of trees per hectare in the stand       | Calculated as the sum of the statistical weights assigned to each tree in the plot, as determined by the French NFI: $N = \sum_{i=1}^n w_i$<br>where $N$ is the number of trees per hectare in the stand, obtained as the sum of the statistical weights ( $w$ , in trees $ha^{-1}$ ) of the $n$ trees inventoried on the plot                                                                                                                                                                                                                        | NFI    |
| G               | $m^2 ha^{-1}$   | Continuous  | Basal area per hectare of the stand            | Calculated as the sum of the basal areas of all trees recorded within the plot, weighted by their statistical weight: $G = \sum_{i=1}^n (BA_i \times w_i)$<br>where $G$ is the basal area per hectare of the stand, obtained as the sum of the basal area (BA, in $m^2$ ) of the $n$ trees inventoried on the plot, multiplied by their statistical weight ( $w$ , in trees $ha^{-1}$ )                                                                                                                                                               | NFI    |
| DQ              | cm              | Continuous  | Quadratic mean diameter of the stand           | Calculated as the square root of the weighted sum of squared diameters at breast height of all inventoried trees (Curtis and Marshall, 2000): $DQ = \sqrt{\frac{\sum_{i=1}^n w_i \times DBH_i^2}{N}}$<br>where $DQ$ is the quadratic mean diameter of the stand, obtained as the sum of the squared diameter at breast height (DBH, in cm) of the $n$ trees inventoried in the plot, each multiplied by its statistical weight ( $w$ , in trees $ha^{-1}$ ), and divided by the number of trees per hectare in the stand ( $N$ , in trees $ha^{-1}$ ) | NFI    |

|      |    |             |                                                                                 |                                                                                                                                                                                                                                                                                                                                                                                                                                                                                                                                                                                                                                |                        |
|------|----|-------------|---------------------------------------------------------------------------------|--------------------------------------------------------------------------------------------------------------------------------------------------------------------------------------------------------------------------------------------------------------------------------------------------------------------------------------------------------------------------------------------------------------------------------------------------------------------------------------------------------------------------------------------------------------------------------------------------------------------------------|------------------------|
| HDOM | m  | Continuous  | Dominant height of the stand (mean height of the 100 tallest trees per hectare) | Calculated by replicating each tree according to its statistical weight ( $w$ , in trees $\text{ha}^{-1}$ ), and by computing, for each plot, the mean height of the 100 tallest trees in the replicated sample                                                                                                                                                                                                                                                                                                                                                                                                                | NFI                    |
| VSTR | -  | Categorical | Vertical structure of the stand                                                 | Calculated at the plot level by the French National Forest Inventory by combining information on the height, origin, crown free cover percentage, and basal area of each inventoried tree; it comprises four classes: regular forest, irregular forest, coppice, and forest–coppice mix                                                                                                                                                                                                                                                                                                                                        | NFI                    |
| COMP | -  | Categorical | Forest composition type                                                         | Estimated from the French BD Forêt® version 2 map, developed between 2007 and 2018 using photo-interpretation of color infrared BD ORTHO® imagery. The map assigns a vegetation formation type to each polygon $\geq 0.5$ ha, based on a national nomenclature of 32 hierarchical classes that distinguish, for example, pure stands of the main forest species of metropolitan France. Produced at the departmental level, BD Forêt® version 2 covers the entire metropolitan territory. The map is available here: <a href="https://www.data.gouv.fr/datasets/bd-foret-r/">https://www.data.gouv.fr/datasets/bd-foret-r/</a> | NFI                    |
| SNA  | -  | Discrete    | Soil nutrient availability index                                                | Calculated from the understory flora surveyed in the field; each plant species is assigned a trophic level as defined in <i>La Flore forestière française</i> (Rameau et al., 1989, 1994, 2008); this index aims to indicate the overall nutrient richness of the soil                                                                                                                                                                                                                                                                                                                                                         | NFI                    |
| RAD  | -  | Discrete    | Solar radiation index                                                           | Radiation is estimated by French NFI from reference charts, as a function of latitude, slope, aspect, and the opposite horizon mask of the point. An index value of 100 represents the average condition (e.g., flat terrain). Values $>100$ correspond to sunny situations, while values $<100$ correspond to shaded situations                                                                                                                                                                                                                                                                                               | NFI                    |
| SWC  | mm | Continuous  | Soil water capacity                                                             | Calculated by the French NFI from the coarse fragment content, the depth of the soil horizons, and a coefficient associated with the texture of each horizon                                                                                                                                                                                                                                                                                                                                                                                                                                                                   | NFI                    |
| SWD  |    | Continuous  | Summer soil water deficit (June-August)                                         | Calculated as the difference between potential and actual evapotranspiration for June, July, and August and assigned to each forest plot based on a corresponding map at one-kilometer resolution (see Piedallu et al., 2016 for details)                                                                                                                                                                                                                                                                                                                                                                                      | Piedallu et al. (2016) |
| SCN  | -  | Continuous  | Soil carbon-to-nitrogen ratio                                                   | Carbon-to-nitrogen ratio in the upper A horizon inferred from the flora and assigned to each forest plot based on a corresponding map at one-kilometer resolution (see Piedallu et al., 2016 for details)                                                                                                                                                                                                                                                                                                                                                                                                                      | Piedallu et al. (2016) |
| TM   | °C | Continuous  | Mean annual temperature                                                         | Assigned to each forest plot based on the spatialised climatic normal (over the 30-year period from 1991 to 2020) calculated at a one-kilometer resolution by Météo-France using the AURELHY method (Canellas et al., 2014)                                                                                                                                                                                                                                                                                                                                                                                                    | Météo France           |
| P    | mm | Continuous  | Total annual precipitation                                                      | Assigned to each forest plot based on the spatialised climatic normal (over the 30-year period from 1991 to 2020) calculated at a one-kilometer resolution by Météo-France using the AURELHY method (Canellas et al., 2014)                                                                                                                                                                                                                                                                                                                                                                                                    | Météo France           |

## References

Canellas, C., Gibelin, A.-L., Lassègues, P., Kerdoncuff, M., Dandin, P., and Simon, P.: Les normales climatiques spatialisées Aurelhy 1981-2010: températures et précipitations, *La météorologie*, 2014, 47–55, <https://doi.org/10.4267/2042/53750>, 2014.

- Curtis, R. O. and Marshall, D. D.: Why quadratic mean diameter?, *Western Journal of Applied Forestry*, 15, 137–139, <https://doi.org/10.1093/wjaf/15.3.137>, 2000.
- de Martonne, E.: Une nouvelle fonction climatologique : l'indice d'aridité, *Meteorologie*, 2, 449–459, 1926.
- 55 Piedallu, C., Gégout, J.-C., Lebourgeois, F., and Seynave, I.: Soil aeration, water deficit, nitrogen availability, acidity and temperature all contribute to shaping tree species distribution in temperate forests, *Journal of Vegetation Science*, 27, 387–399, <https://doi.org/10.1111/jvs.12370>, 2016.
- Rameau, J.-C., Mansion, D., and Dumé, G.: *Flore forestière française: Plaines et collines*, Forêt privée française, 1989.
- 60 Rameau, J.-C., Mansion, D., and Dumé, G.: *Flore forestière française tome 2, Montagnes: guide écologique illustré*, Forêt privée française, 1994.
- Rameau, J.-C., Mansion, D., Dumé, G., and Gauberville, C.: *Flore forestière française tome 3, région méditerranéenne: Guide écologique illustré*, CNPF-IDF, 2008.
- 65 Vallet, P., Dhôte, J.-F., Le Moguédec, G., Ravart, M., and Pignard, G.: Development of total aboveground volume equations for seven important forest tree species in France, *Forest Ecology and Management*, 229, 98–110, <https://doi.org/10.1016/j.foreco.2006.03.013>, 2006.
- Wykoff, W. R.: Predicting basal area increment for individual northern Rocky Mountain conifers, in: *Forest Growth Modelling and Simulation*, *Mitteilungen der Forstlichen Bundesversuchsanstalt*, 1983.

70 Table S2: List of the 44 species present in the *XyloDensMap* data subset selected for wood density modelling, with for each the corresponding botanical class and wood structure, the number of wood density records, and the proportion it represents in the growing stock in mainland France.

| Botanical class | Wood structure             | Species                     | Number of wood density records    | Proportion in growing stock (%) |      |
|-----------------|----------------------------|-----------------------------|-----------------------------------|---------------------------------|------|
| Broadleaf       | Ring-porous                | <i>Quercus robur</i>        | 7 879                             | 12.51                           |      |
|                 |                            | <i>Quercus petraea</i>      | 6 731                             | 11.42                           |      |
|                 |                            | <i>Quercus pubescens</i>    | 4 202                             | 4.5                             |      |
|                 |                            | <i>Fraxinus excelsior</i>   | 3 516                             | 3.43                            |      |
|                 |                            | <i>Castanea sativa</i>      | 3 453                             | 5.79                            |      |
|                 |                            | <i>Robinia pseudoacacia</i> | 1 043                             | 1.26                            |      |
|                 |                            | <i>Ulmus minor</i>          | 561                               | 0.17                            |      |
|                 |                            | <i>Quercus pyrenaica</i>    | 266                               | 0.29                            |      |
|                 |                            | <i>Quercus rubra</i>        | 261                               | 0.31                            |      |
|                 | Semi ring-porous           | <i>Fagus sylvatica</i>      | 7 256                             | 11.57                           |      |
|                 |                            | <i>Corylus avellana</i>     | 1 317                             | 0.32                            |      |
|                 |                            | <i>Prunus avium</i>         | 1 308                             | 0.9                             |      |
|                 |                            | <i>Quercus ilex</i>         | 1 091                             | 1.7                             |      |
|                 |                            | <i>Populus tremula</i>      | 1 025                             | 1.1                             |      |
|                 |                            | <i>Salix caprea</i>         | 878                               | 0.32                            |      |
|                 |                            | <i>Sorbus torminalis</i>    | 722                               | 0.2                             |      |
|                 |                            | <i>Sorbus aria</i>          | 608                               | 0.21                            |      |
|                 |                            | <i>Ilex aquifolium</i>      | 390                               | 0.09                            |      |
|                 |                            | <i>Salix cinerea</i>        | 235                               | 0.12                            |      |
|                 |                            | <i>Arbutus unedo</i>        | 218                               | 0.17                            |      |
|                 |                            | <i>Sorbus aucuparia</i>     | 183                               | 0.07                            |      |
|                 |                            | <i>Sambucus nigra</i>       | 162                               | 0.02                            |      |
|                 |                            | <i>Quercus suber</i>        | 159                               | 0.3                             |      |
|                 |                            | Diffuse-porous              | <i>Carpinus betulus</i>           | 6 006                           | 4.79 |
|                 | <i>Betula pendula</i>      |                             | 1 980                             | 1.44                            |      |
|                 | <i>Acer campestre</i>      |                             | 1 645                             | 0.93                            |      |
|                 | <i>Acer pseudoplatanus</i> |                             | 1 251                             | 1.16                            |      |
|                 | <i>Crataegus monogyna</i>  |                             | 998                               | 0.18                            |      |
|                 | <i>Alnus glutinosa</i>     |                             | 810                               | 1.2                             |      |
|                 | <i>Populus</i>             |                             | 597                               | 1.06                            |      |
|                 | <i>Tilia cordata</i>       |                             | 443                               | 0.42                            |      |
|                 | <i>Tilia platyphyllos</i>  |                             | 382                               | 0.4                             |      |
|                 | <i>Betula pubescens</i>    |                             | 364                               | 0.31                            |      |
|                 | <i>Acer monspessulanum</i> |                             | 241                               | 0.11                            |      |
|                 | <i>Acer opalus</i>         |                             | 195                               | 0.15                            |      |
|                 | Conifer                    | Conifer                     | <i>Pinus sylvestris</i>           | 3 273                           | 4.68 |
|                 |                            |                             | <i>Abies alba</i>                 | 3 202                           | 6.47 |
|                 |                            |                             | <i>Picea abies</i>                | 3 003                           | 4.97 |
|                 |                            |                             | <i>Pinus pinaster</i>             | 2 466                           | 4.83 |
|                 |                            |                             | <i>Pseudotsuga menziesii</i>      | 1 833                           | 3.54 |
|                 |                            |                             | <i>Pinus nigra</i>                | 600                             | 1.28 |
|                 |                            |                             | <i>Pinus halepensis</i>           | 562                             | 0.77 |
|                 |                            |                             | <i>Pinus nigra var. corsicana</i> | 553                             | 1.01 |
|                 |                            |                             | <i>Larix decidua</i>              | 281                             | 0.68 |
| <b>Total</b>    |                            |                             | <b>74 149</b>                     | <b>97.2</b>                     |      |

**Table S3: Correlation coefficients between wood density and the candidate variables for the 44 species present in the subset of *XyloDensMap* data selected for wood density modelling. For variables relative to ontogenetic tree traits (RW5, DBH, SLD and BAL), the logarithm instead of the raw value was used.**

| Botanical class | Wood structure               | Species                     | RW5                               | DBH   | SLD   | BAL   | N     | G     | DQ    | HDOM  | SNA   | RAD   | SWC   | SWD   | SCN   | TM    | P     |       |
|-----------------|------------------------------|-----------------------------|-----------------------------------|-------|-------|-------|-------|-------|-------|-------|-------|-------|-------|-------|-------|-------|-------|-------|
| Broadleaf       | Ring-porous                  | <i>Castanea sativa</i>      | 0.05                              | -0.08 | -0.19 | -0.03 | -0.07 | -0.12 | -0.04 | -0.18 | -0.08 | 0.07  | -0.04 | 0.19  | 0.08  | 0.19  | -0.04 |       |
|                 |                              | <i>Fraxinus excelsior</i>   | 0.33                              | 0.08  | -0.18 | -0.27 | -0.05 | -0.21 | -0.13 | -0.31 | 0.01  | 0.02  | -0.01 | 0.11  | 0.05  | 0.12  | -0.02 |       |
|                 |                              | <i>Quercus petraea</i>      | 0.26                              | 0.02  | -0.09 | -0.16 | 0.02  | -0.11 | -0.08 | -0.18 | 0.09  | 0     | -0.06 | 0.15  | 0.02  | 0.11  | -0.05 |       |
|                 |                              | <i>Quercus pubescens</i>    | 0.3                               | 0.28  | 0.05  | -0.22 | -0.06 | -0.04 | 0.05  | 0.02  | -0.01 | 0     | 0.06  | 0.08  | -0.04 | 0.17  | -0.04 |       |
|                 |                              | <i>Quercus pyrenaica</i>    | 0.33                              | 0.31  | 0.07  | -0.31 | -0.09 | -0.13 | 0.04  | -0.07 | 0.13  | -0.05 | 0.14  | 0.01  | -0.17 | 0.03  | 0.06  |       |
|                 |                              | <i>Quercus robur</i>        | 0.25                              | 0.04  | -0.07 | -0.1  | -0.04 | -0.08 | -0.01 | -0.14 | -0.02 | 0     | -0.02 | 0.15  | 0.1   | 0.2   | 0.03  |       |
|                 |                              | <i>Quercus rubra</i>        | 0.32                              | 0.36  | -0.13 | -0.24 | -0.14 | -0.06 | 0.15  | 0.11  | -0.14 | 0.04  | 0.19  | 0.02  | -0.02 | 0.09  | 0.02  |       |
|                 |                              | <i>Robinia pseudoacacia</i> | 0.33                              | 0.37  | 0.03  | -0.31 | -0.14 | -0.1  | 0.06  | -0.06 | -0.02 | 0.02  | 0     | 0.04  | 0.13  | 0.13  | 0.09  |       |
|                 | <i>Ulmus minor</i>           | 0.07                        | 0                                 | -0.06 | -0.06 | 0.06  | -0.05 | -0.12 | -0.19 | 0.07  | 0.03  | -0.04 | 0.08  | -0.01 | 0.09  | -0.01 |       |       |
|                 | Semi ring-porous             | <i>Arbutus unedo</i>        | 0.23                              | 0.24  | 0.09  | -0.03 | 0.09  | 0.03  | -0.07 | -0.03 | -0.07 | -0.06 | 0.09  | 0.04  | -0.1  | 0.06  | -0.1  |       |
|                 |                              | <i>Corylus avellana</i>     | 0.06                              | 0.23  | -0.11 | -0.05 | 0.03  | 0     | -0.02 | -0.05 | -0.05 | 0.03  | 0.06  | 0.02  | 0.06  | 0.05  | 0.02  |       |
|                 |                              | <i>Fagus sylvatica</i>      | 0.19                              | -0.01 | -0.07 | -0.08 | 0.01  | -0.12 | -0.1  | -0.12 | 0.08  | 0.01  | 0     | 0.04  | -0.05 | 0.08  | -0.04 |       |
|                 |                              | <i>Ilex aquifolium</i>      | -0.02                             | 0.19  | -0.12 | -0.11 | 0.01  | -0.08 | -0.09 | -0.07 | 0.02  | 0.03  | -0.06 | 0.06  | -0.02 | -0.07 | -0.06 |       |
|                 |                              | <i>Populus tremula</i>      | -0.06                             | 0.29  | -0.06 | -0.11 | -0.05 | 0.06  | 0.13  | 0.1   | -0.07 | 0     | -0.01 | 0.16  | 0.05  | 0.19  | 0.01  |       |
|                 |                              | <i>Prunus avium</i>         | 0.05                              | -0.11 | -0.33 | -0.1  | -0.06 | -0.15 | -0.08 | -0.29 | 0.04  | 0.07  | -0.12 | 0.11  | 0.02  | 0.05  | -0.08 |       |
|                 |                              | <i>Quercus ilex</i>         | 0.37                              | 0.36  | 0     | -0.11 | 0.04  | 0.08  | 0.08  | 0.01  | -0.09 | -0.04 | 0.06  | -0.06 | 0.06  | -0.03 | -0.09 |       |
|                 |                              | <i>Quercus suber</i>        | -0.09                             | 0.42  | -0.1  | -0.23 | -0.05 | 0.02  | 0.19  | -0.19 | 0.08  | -0.01 | -0.09 | 0.09  | -0.01 | 0.09  | -0.17 |       |
|                 |                              | <i>Salix caprea</i>         | 0.03                              | -0.06 | -0.14 | -0.01 | -0.02 | -0.08 | -0.03 | -0.17 | -0.01 | -0.02 | -0.11 | 0.09  | 0.06  | 0.07  | 0.04  |       |
|                 |                              | <i>Salix cinerea</i>        | -0.06                             | -0.01 | -0.13 | -0.1  | 0.01  | -0.06 | -0.1  | -0.17 | -0.23 | 0.1   | -0.03 | 0.18  | 0.11  | 0.2   | 0.07  |       |
|                 |                              | <i>Sambucus nigra</i>       | 0.25                              | 0     | 0     | -0.14 | -0.21 | -0.15 | 0.05  | -0.08 | -0.11 | -0.18 | 0.11  | -0.21 | 0.07  | -0.24 | 0.18  |       |
|                 |                              | <i>Sorbus aria</i>          | 0.17                              | 0.07  | -0.26 | -0.19 | -0.03 | -0.11 | -0.1  | -0.23 | -0.01 | -0.06 | -0.01 | -0.01 | 0.01  | 0.03  | 0.03  |       |
|                 |                              | <i>Sorbus aucuparia</i>     | -0.04                             | -0.21 | -0.14 | -0.09 | 0.02  | -0.12 | -0.19 | -0.14 | 0.03  | 0.04  | -0.07 | 0.14  | 0.03  | 0.05  | -0.05 |       |
|                 |                              | <i>Sorbus torminalis</i>    | 0.08                              | -0.06 | -0.11 | -0.06 | -0.06 | -0.09 | -0.03 | -0.07 | -0.02 | -0.04 | 0.02  | 0.05  | 0.03  | 0.06  | -0.07 |       |
|                 |                              | Diffuse-porous              | <i>Acer campestre</i>             | -0.02 | 0.13  | -0.17 | -0.17 | 0.01  | -0.06 | -0.08 | -0.17 | 0.11  | -0.06 | -0.03 | 0.07  | 0.04  | 0.05  | 0.02  |
|                 |                              |                             | <i>Acer monspessulanum</i>        | 0.06  | 0.23  | -0.22 | -0.26 | -0.15 | -0.16 | -0.02 | -0.2  | 0.01  | 0.07  | -0.13 | -0.02 | 0.07  | 0.01  | 0.04  |
|                 | <i>Acer opalus</i>           |                             | 0.03                              | 0.15  | -0.37 | -0.26 | -0.26 | -0.25 | -0.02 | -0.28 | 0.05  | 0.06  | -0.22 | 0.05  | 0.04  | -0.07 | -0.12 |       |
|                 | <i>Acer pseudoplatanus</i>   |                             | -0.09                             | 0.29  | -0.22 | -0.16 | -0.02 | 0.02  | 0.04  | -0.12 | 0.02  | -0.06 | -0.22 | -0.11 | 0.03  | -0.19 | 0.19  |       |
|                 | <i>Alnus glutinosa</i>       |                             | -0.07                             | 0.18  | -0.15 | 0.00  | -0.02 | 0.1   | 0.1   | -0.05 | -0.1  | -0.07 | -0.03 | 0.17  | 0.13  | 0.18  | 0.09  |       |
|                 | <i>Betula pendula</i>        |                             | -0.23                             | 0.45  | 0     | 0.04  | -0.09 | 0.22  | 0.29  | 0.27  | 0.02  | -0.06 | -0.02 | 0     | -0.01 | 0     | 0.05  |       |
|                 | <i>Betula pubescens</i>      |                             | -0.12                             | 0.4   | 0.02  | -0.07 | -0.06 | 0.11  | 0.14  | 0.15  | -0.07 | -0.05 | -0.06 | -0.06 | -0.04 | -0.03 | 0.05  |       |
|                 | <i>Carpinus betulus</i>      |                             | -0.01                             | 0.23  | 0.16  | -0.07 | 0.03  | 0.01  | 0     | 0.03  | 0.09  | 0.02  | -0.05 | 0.05  | -0.05 | -0.01 | -0.02 |       |
|                 | <i>Crataegus monogyna</i>    |                             | 0                                 | 0.02  | -0.07 | -0.03 | -0.02 | 0.01  | 0.03  | -0.03 | -0.01 | 0.04  | -0.04 | -0.04 | 0     | -0.04 | 0.02  |       |
|                 | <i>Populus</i>               |                             | -0.25                             | -0.08 | -0.17 | 0.05  | 0.08  | 0.08  | 0.08  | -0.1  | -0.03 | -0.05 | -0.09 | 0.06  | 0.13  | 0.05  | 0.05  |       |
|                 | <i>Tilia cordata</i>         |                             | -0.01                             | 0.48  | 0.16  | -0.29 | 0.01  | -0.01 | 0.06  | -0.09 | 0.05  | 0.01  | -0.22 | -0.02 | -0.06 | -0.06 | 0.07  |       |
|                 | <i>Tilia platyphyllos</i>    |                             | -0.11                             | 0.34  | 0     | -0.19 | -0.01 | -0.03 | 0     | -0.11 | 0.07  | -0.05 | -0.13 | 0     | -0.13 | -0.01 | 0.02  |       |
|                 | Conifer                      | Conifer                     | <i>Abies alba</i>                 | -0.31 | -0.15 | -0.07 | 0.18  | -0.09 | 0.03  | 0.09  | 0.09  | -0.08 | -0.04 | -0.01 | -0.01 | 0.07  | 0.04  | -0.02 |
|                 |                              |                             | <i>Larix decidua</i>              | -0.29 | 0.25  | 0.1   | 0.1   | -0.11 | 0.18  | 0.28  | 0.23  | 0.06  | -0.11 | -0.19 | 0.19  | 0     | -0.25 | -0.11 |
|                 |                              |                             | <i>Picea abies</i>                | -0.37 | -0.21 | -0.07 | 0.2   | 0.02  | -0.05 | -0.06 | 0.01  | 0.09  | -0.01 | -0.1  | 0.09  | -0.11 | 0.07  | 0     |
|                 |                              |                             | <i>Pinus halepensis</i>           | -0.2  | 0.26  | 0.06  | 0.09  | 0.06  | 0.29  | 0.15  | 0.25  | -0.15 | 0.07  | 0.02  | -0.05 | 0.03  | 0.07  | 0.04  |
|                 |                              |                             | <i>Pinus nigra</i>                | -0.25 | 0.47  | 0.38  | -0.05 | -0.02 | 0.3   | 0.36  | 0.49  | 0.01  | -0.02 | -0.04 | -0.19 | -0.2  | 0.02  | -0.07 |
|                 |                              |                             | <i>Pinus nigra var. corsicana</i> | -0.23 | 0.44  | 0.35  | 0.04  | -0.03 | 0.25  | 0.27  | 0.48  | -0.11 | -0.18 | -0.12 | 0.15  | 0.05  | 0.11  | 0.16  |
|                 |                              |                             | <i>Pinus pinaster</i>             | -0.44 | 0.56  | 0.44  | 0.05  | -0.13 | 0.36  | 0.45  | 0.54  | 0.14  | -0.09 | 0.08  | 0.14  | -0.27 | -0.12 | -0.01 |
|                 |                              |                             | <i>Pinus sylvestris</i>           | -0.21 | 0.28  | 0.26  | 0.02  | -0.04 | 0.18  | 0.2   | 0.28  | -0.05 | 0.02  | 0.04  | 0.08  | -0.04 | 0.19  | -0.1  |
|                 | <i>Pseudotsuga menziesii</i> | -0.07                       | 0.18                              | 0.26  | 0.08  | -0.12 | 0.02  | 0.14  | 0.22  | -0.06 | 0.02  | 0.11  | 0.1   | -0.05 | 0.29  | -0.04 |       |       |

**Table S4: Results of the analysis of variance performed on the “taxonomic model” of wood density.**

| <b>Variable type</b> | <b>Variable</b> | <b>Degree of freedom</b> | <b>Sum of squares</b> | <b>F value</b> | <b>p-value</b> | <b>Variance explained (%)</b> |
|----------------------|-----------------|--------------------------|-----------------------|----------------|----------------|-------------------------------|
| Tree identity        | Botanical class | 1                        | 374 234 919           | 139 322        | <0.0001        | 40.1                          |
|                      | Genus           | 23                       | 286 489 849           | 4 637          | <0.0001        | 30.8                          |
|                      | Species         | 19                       | 70 285 320            | 1 377          | <0.0001        | 7.5                           |
|                      | Residuals       | 74 105                   | 199 053 778           | -              | -              | 21.6                          |

80 Table S5: Number of times variables are significant across the 44 species in the “NFI-based model” of wood density. For variables relative to tree dimensions (RW5, DBH, SLD, and BAL), a log-transformation was used.

| Variable | Broadleaf   |                  |                | Conifer | Total |
|----------|-------------|------------------|----------------|---------|-------|
|          | Ring-porous | Semi ring-porous | Diffuse-porous |         |       |
| RW5      | 8           | 6                | 9              | 9       | 32    |
| SLD      | 5           | 11               | 10             | 6       | 32    |
| DBH      | 7           | 7                | 10             | 7       | 31    |
| TM       | 7           | 6                | 4              | 7       | 24    |
| SNA      | 5           | 5                | 4              | 7       | 21    |
| SWC      | 6           | 4                | 5              | 6       | 21    |
| BAL      | 3           | 2                | 5              | 5       | 15    |
| G        | 4           | 2                | 2              | 6       | 14    |
| P        | 4           | 6                | 3              | 1       | 14    |
| DQ       | 4           | 2                | 5              | 2       | 13    |
| N        | 3           | 1                | 3              | 5       | 12    |
| RAD      | 1           | 2                | 2              | 3       | 8     |

**Table S6: Coefficients of the “NFI-based model” for the 44 species present in the subset of *XyloDensMap* data selected for wood density modelling. For variables relative to tree dimensions (RW5, DBH, SLD and BAL), a log-transformation was used so that**

**85** coefficients are on the log scale. Significant parameters at the p-value threshold of 0.1 are symbolized by ‘\*’.

| Botanical class              | Wood structure                    | Species                     | Intercept | RW5               | DBH    | SLD    | BAL    | N       | G       | DQ      | SNA    | RAD     | SWC     | TM      | P       |         |
|------------------------------|-----------------------------------|-----------------------------|-----------|-------------------|--------|--------|--------|---------|---------|---------|--------|---------|---------|---------|---------|---------|
| Broadleaf                    | Ring-porous                       | <i>Castanea sativa</i>      | 481.2*    | 5.3*              | -5.4*  | -36*   | 0.5    | -0.006* | 0       | -0.24   | -1.55* | 0.187*  | -0.081* | 9.1*    | -0.013* |         |
|                              |                                   | <i>Fraxinus excelsior</i>   | 579.3*    | 18.6*             | 4.6*   | -26.7* | -2.6*  | 0.005*  | -0.39*  | -0.4*   | -0.02  | -0.03   | -0.024  | 4.5*    | 0.013*  |         |
|                              |                                   | <i>Quercus petraea</i>      | 620.9*    | 25.8*             | -4.3*  | -16.2* | -2.3*  | 0.001   | -0.03   | -0.19*  | 2.39*  | -0.043  | -0.131* | 7.5*    | 0.004   |         |
|                              |                                   | <i>Quercus pubescens</i>    | 545.6*    | 21.9*             | 31.4*  | -9.3*  | -0.6   | 0.003   | -0.16   | -0.66*  | 0.8*   | -0.013  | -0.043* | 8*      | 0.006   |         |
|                              |                                   | <i>Quercus pyrenaica</i>    | 591.9*    | 19.4*             | 28.2*  | 2.7    | -0.4   | 0.004   | -0.74*  | -0.02   | 5.41*  | 0.001   | 0.109   | 0.4     | -0.011  |         |
|                              |                                   | <i>Quercus robur</i>        | 528*      | 18.8*             | 1.9    | -11.4* | 0      | -0.003* | 0.05    | -0.13   | 0.03   | 0.015   | -0.082* | 9.5*    | 0.016*  |         |
|                              |                                   | <i>Quercus rubra</i>        | 486.8     | 10.1              | 36.8*  | -10.2  | 4.7    | 0.017   | -0.85*  | 0.49    | -5.87* | 0.038   | 0.182*  | 5.3     | -0.019  |         |
|                              |                                   | <i>Robinia pseudoacacia</i> | 396.1     | 19.2*             | 46*    | -4.2   | -4.6*  | 0.008   | -0.71*  | 1.21*   | -0.38  | 0.162   | -0.087* | 8.1*    | 0.015*  |         |
|                              |                                   | <i>Ulmus minor</i>          | 532.3*    | 7.4*              | 5.8    | -7.4   | 5.8    | 0.002   | -0.22   | -1.12   | 2.13   | 0.112   | -0.06   | 6.2*    | -0.004  |         |
|                              | Semi ring-porous                  | <i>Arbutus unedo</i>        | 548.6     | 23*               | 67.5*  | 34.9*  | 7.6    | 0       | -0.16   | -1.44   | -4.09* | -0.022  | 0.1     | -0.6    | -0.034  |         |
|                              |                                   | <i>Corylus avellana</i>     | 429.6     | 1.7               | 44.6*  | -16.8* | 1.6    | 0.001   | -0.12   | 0.01    | -1.12  | 0.096   | 0.039   | 1.2     | 0.004   |         |
|                              |                                   | <i>Fagus sylvatica</i>      | 602.3*    | 11.7*             | -0.8   | -13*   | 1.7*   | 0.001   | -0.16*  | -0.27*  | 1.18*  | -0.023  | 0.003   | 2.1*    | 0.005*  |         |
|                              |                                   | <i>Ilex aquifolium</i>      | 644.3*    | -3.9              | 38.8*  | -30.8* | -2.6   | 0.004   | -0.19   | -0.28   | 0.18   | 0.057   | -0.039  | -2.5    | -0.016  |         |
|                              |                                   | <i>Populus tremula</i>      | 264.7*    | -14.5*            | 37.9*  | -19*   | 2.6    | 0.002   | -0.2    | -0.4    | -1.71* | -0.001  | -0.076* | 12*     | 0.022*  |         |
|                              |                                   | <i>Prunus avium</i>         | 610*      | 2.7               | -8.7*  | -50.8* | -2.5   | -0.001  | -0.08   | -0.05   | 0.81   | 0.166*  | -0.072* | 1.2     | -0.009  |         |
|                              |                                   | <i>Quercus ilex</i>         | 977*      | 42.6*             | 23.8*  | -5.3   | -1.1   | 0.002   | -0.03   | 0.37    | -2.92* | -0.091  | -0.021  | -5.9*   | -0.064* |         |
|                              |                                   | <i>Quercus suber</i>        | 662.9*    | -7.1              | 78.2*  | -37.4* | -13.9* | 0.022   | 0.48    | 2.95*   | -9.43  | 0.095   | -0.288  | -4.3    | -0.1*   |         |
|                              |                                   | <i>Salix caprea</i>         | 484.5*    | 2.7               | -8.9   | -25.7* | 3.1    | 0.011*  | -0.72*  | 0.75    | -0.2   | 0.001   | -0.126* | 4.3*    | 0.017*  |         |
|                              |                                   | <i>Salix cinerea</i>        | 457.2     | -5.2              | -5.8   | -33.3* | -2.9   | 0.006   | -0.56   | -0.62   | -6.53* | 0.475   | -0.087  | 8.7*    | 0.014   |         |
|                              |                                   | <i>Sambucus nigra</i>       | 687.6*    | 18.6*             | 1.7    | 11.7   | -9.1   | -0.002  | -0.09   | 1.03    | 0.96   | -0.77*  | 0.166*  | -14.7*  | 0.042*  |         |
|                              |                                   | <i>Sorbus aria</i>          | 663.4*    | 8.6*              | 4      | -35.8* | -8.2   | -0.001  | 0.41    | -0.44   | 0.28   | -0.075  | 0.008   | 2.9     | 0.009   |         |
|                              |                                   | <i>Sorbus aucuparia</i>     | 636.4*    | -4.2              | -19.1  | -17.3  | 0.2    | -0.016  | 0.31    | -2.1    | 1.9    | 0.066   | -0.111  | 2.5     | -0.003  |         |
|                              | <i>Sorbus torminalis</i>          | 722*                        | 6.2       | -7.6              | -17.3* | 1.6    | -0.007 | -0.1    | -0.51   | 0.23    | -0.114 | 0.021   | 0.6     | -0.017  |         |         |
|                              | Diffuse-porous                    | <i>Acer campestre</i>       | 548.9*    | -6.6*             | 14.5*  | -27.5* | -3.5   | -0.001  | 0.05    | -0.71*  | 3.2*   | -0.166* | 0.013   | 2.8*    | 0.005   |         |
|                              |                                   | <i>Acer monspessulanum</i>  | 685.8*    | 1                 | 24.5*  | -25.4* | -3.3   | -0.016  | 0.85    | -2.33   | -0.39  | 0.124   | -0.118  | 2       | -0.01   |         |
|                              |                                   | <i>Acer opalus</i>          | 730.9*    | -4.4              | 23.7*  | -56*   | 0      | -0.021* | 0.56    | -2.34   | -1.66  | 0.041   | -0.381* | -0.3    | -0.021  |         |
|                              |                                   | <i>Acer pseudoplatanus</i>  | 538.2*    | -11.1*            | 29.6*  | -46.6* | -0.5   | 0.002   | -0.07   | -0.43   | -0.08  | 0.02    | -0.131* | -1.9    | 0.011*  |         |
|                              |                                   | <i>Alnus glutinosa</i>      | 389.5     | -6*               | 23.3*  | -25.9* | 5.7*   | -0.006  | 0.13    | -0.91*  | -2.57* | -0.255  | 0.018   | 6.3*    | 0.009   |         |
|                              |                                   | <i>Betula pendula</i>       | 381.7     | -16.2*            | 55.4*  | -16.6* | 6.6*   | -0.006* | 0.13    | -0.42   | -0.13  | -0.103  | -0.013  | 3.1*    | 0.002   |         |
|                              |                                   | <i>Betula pubescens</i>     | 411       | -11.5*            | 51.5*  | 4.2    | 5      | -0.004  | 0.19    | -0.69   | -3.23  | -0.217  | -0.091  | 1.5     | 0.002   |         |
|                              |                                   | <i>Carpinus betulus</i>     | 504.6*    | -3.6*             | 26.5*  | 23*    | 4.5*   | 0.002   | -0.22*  | -0.44*  | 1.19*  | 0.086   | -0.037* | 1       | -0.007* |         |
|                              |                                   | <i>Crataegus monogyna</i>   | 648*      | 0.4               | -2.3   | -10.2  | -8.1*  | 0.005   | 0.21    | 0.93*   | -0.2   | 0.105   | -0.032  | -1.3    | 0       |         |
|                              |                                   | <i>Populus</i>              | 497.9     | -21.1*            | 1.2    | -69.2* | 2.4    | -0.002  | 0.34    | -0.44   | -0.23  | -0.639  | -0.056  | 7.2*    | 0.005   |         |
|                              |                                   | <i>Tilia cordata</i>        | 214.3*    | -11.4*            | 61.5*  | 30.9*  | 4.2    | 0.02*   | -0.85*  | 0.42    | -3.51* | 0.282*  | -0.312* | 2.7     | 0.015   |         |
|                              |                                   | <i>Tilia platyphyllos</i>   | 351.3     | -20.3*            | 63.6*  | -24.8* | 9.6*   | 0.004   | -0.53   | -1.35*  | -0.98  | -0.133  | -0.192* | 2.1     | -0.018* |         |
|                              |                                   | Conifer                     | Conifer   | <i>Abies alba</i> | 408.1* | -17.2* | 3.5    | -8.5*   | 3.8*    | -0.009* | -0.18* | 0.11    | -1.54*  | -0.081* | -0.02   | 3.3*    |
|                              | <i>Larix decidua</i>              |                             |           | 477.7*            | -19.3* | 15.1*  | 18.6   | 1.2     | -0.009  | -0.06   | 0.4    | 0       | -0.026  | -0.155* | -3.8*   | -0.008  |
|                              | <i>Picea abies</i>                |                             |           | 375.1*            | -21.6* | 4.6    | -1.6   | 4.6*    | -0.004  | -0.38*  | -0.35* | 0.75*   | 0.053   | -0.068* | 2.7*    | 0.001   |
|                              | <i>Pinus halepensis</i>           |                             |           | 506.4*            | -8.3*  | 15.1*  | -9.9   | 0.9     | -0.013* | 1.24*   | -0.16  | -3.6*   | 0.144   | 0.016   | 0       | -0.005  |
|                              | <i>Pinus nigra</i>                |                             |           | 333.8*            | -16.1* | 50*    | 37.3*  | 0.7     | -0.02*  | 0.73*   | -0.51  | 2.25*   | -0.107  | -0.197* | 2.7     | -0.028* |
|                              | <i>Pinus nigra var. corsicana</i> |                             |           | 138.8*            | -10.5* | 54.5*  | 54.6*  | 7.9*    | 0.011   | -0.63*  | -0.14  | -2.91*  | -0.397* | -0.14*  | 13.4*   | 0.013   |
|                              | <i>Pinus pinaster</i>             |                             |           | 257.4*            | -23.2* | 44.6*  | 24.9*  | 1.9     | 0       | -0.13   | 0.03   | 1       | -0.207* | 0.026   | 3.4*    | 0.007   |
| <i>Pinus sylvestris</i>      | 270.6*                            |                             |           | -16.1*            | 29.4*  | 20.7*  | 3.9*   | -0.005* | 0.1     | -0.14   | 0.62*  | 0.053   | -0.072* | 7.1*    | -0.003  |         |
| <i>Pseudotsuga menziesii</i> | 239.2*                            |                             |           | -4.1*             | 21.6*  | 33*    | 7.7*   | -0.008* | -0.39*  | -0.75*  | -3.72* | 0.087   | 0.068*  | 11.2*   | 0.005   |         |
